# Supplementary material
Source: PubMed Central journal article supplement (PMC6062810)
Supplement: JCM.01943-17_zjm999096012s1.pdf [file JCM.01943-17_zjm999096012s1.pdf]

**Supplemental Table 1. Agreement between the various testing strategies**

| Samples (No.)                                     | % Agreement-<br>First-tier Tests | Kappa Value <sup>a</sup> | % Agreement-<br>MTTs | Kappa Value <sup>a</sup> | % Agreement-<br>STTs | Kappa Value <sup>a</sup> |
|---------------------------------------------------|----------------------------------|--------------------------|----------------------|--------------------------|----------------------|--------------------------|
| <b><i>Lyme disease (124)</i></b>                  |                                  |                          |                      |                          |                      |                          |
| Early Lyme disease with EM                        |                                  |                          |                      |                          |                      |                          |
| Acute (40)                                        | 75                               | 0.64 (0.47, 0.82)        | 88                   | 0.83 (0.65, 1.01)        | 90                   | 0.87 (0.69, 1.04)        |
| Convalescent (38)                                 | 76                               | 0.38 (0.19, 0.56)        | 89                   | 0.80 (0.62, 0.98)        | 95                   | 0.93 (0.74, 1.11)        |
| Lyme neuroborreliosis or<br>Lyme carditis         |                                  |                          |                      |                          |                      |                          |
| Lyme neuroborreliosis (10)                        | 100                              | NaN                      | 100                  | NaN                      | 100                  | 1 (0.64, 1]              |
| Lyme carditis (7)                                 | 71                               | 0.22 (-0.21, 0.65)       | 86                   | 0.74 (0.31, 1.17)        | 71                   | 0.22 (-0.21, 0.65)       |
| Late Lyme disease                                 |                                  |                          |                      |                          |                      |                          |
| Lyme arthritis (29)                               | 100                              | NaN                      | 100                  | NaN                      | 100                  | 1 (0.79, 1]              |
| <b><i>Negative controls (347)<sup>b</sup></i></b> |                                  |                          |                      |                          |                      |                          |
| Other diseases (144)                              |                                  |                          |                      |                          |                      |                          |
| Fibromyalgia (31)                                 | 71                               | -0.11 (-0.31, 0.1)       | 100                  | NaN                      | 100                  | NaN                      |
| Severe periodontitis (20)                         | 95                               | -0.02 (-0.27, 0.24)      | 100                  | NaN                      | 100                  | NaN                      |
| Rheumatoid arthritis (21)                         | 57                               | -0.17 (-0.41, 0.08)      | 100                  | NaN                      | 100                  | NaN                      |
| Syphilis (20)                                     | 10                               | -0.29 (-0.54, -0.04)     | 80                   | -0.07 (-0.32, 0.18)      | 100                  | NaN                      |
| Multiple sclerosis (22)                           | 64                               | -0.03 (-0.27, 0.21)      | 95                   | -0.02 (-0.26, 0.23)      | 100                  | NaN                      |
| Infectious mononucleosis (30)                     | 30                               | -0.19 (-0.4, 0.01)       | 90                   | -0.03 (-0.24, 0.17)      | 70                   | 0.07 (-0.14, 0.27)       |
| Healthy Controls (203)                            |                                  |                          |                      |                          |                      |                          |
| Endemic (101)                                     | 75                               | 0.02 (-0.1, 0.13)        | 100                  | 1 (0.89, 1]              | 96                   | 0.42 (0.3, 0.53)         |
| Non-endemic (102)                                 | 75                               | 0.02 (-0.09, 0.13)       | 97                   | -0.01 (-0.12, 0.11)      | 99                   | 0 (-0.12, 0.11)          |
| <b><i>All Samples tested (471)</i></b>            | 71                               | 0.55 (0.49, 0.6)         | 96                   | 0.91 (0.86, 0.96)        | 95                   | 0.90 (0.85, 0.95)        |

<sup>a</sup>NaN; not a number; the Kappa statistic cannot be computed because the test results were either all positive or all negative for both strategies.

<sup>b</sup>A total of 7 controls were positive by both WCS and C6; a total of 2 controls were positive by both VIsE and C6; a total of 2 controls were positive by both VIsE and WCS; and 1 control was positive by all three first-tier tests.
