# Supplementary material
Source: PubMed Central journal article supplement (PMC6062810)
Supplement: JCM.01943-17_zjm999096012s2.pdf [file JCM.01943-17_zjm999096012s2.pdf]

**Supplemental Table 2. IgM and IgG Immunoblot Reactivity**

| Samples (No.)                             | ViraStripe IgM                                   | ViraStripe IgM                                            | IgG<br>Immunoblot |
|-------------------------------------------|--------------------------------------------------|-----------------------------------------------------------|-------------------|
|                                           | immunoblot-duration of<br>illness not considered | immunoblot-duration of<br>illness considered <sup>a</sup> |                   |
| No. Pos. (% Pos.)                         |                                                  |                                                           |                   |
| <b><i>Lyme disease (124)</i></b>          |                                                  |                                                           |                   |
| Early Lyme disease with EM                |                                                  |                                                           |                   |
| Acute (40)                                | 21 (53)                                          | 21 (53)                                                   | 5 (13)            |
| Convalescent (38)                         | 29 (76)                                          | 18 (47)                                                   | 11 (29)           |
| Lyme neuroborreliosis or<br>Lyme carditis |                                                  |                                                           |                   |
| Lyme neuroborreliosis (10)                | 9 (90)                                           | 7 (70)                                                    | 4 (40)            |
| Lyme carditis (7)                         | 5 (71)                                           | 4 (57)                                                    | 5 (71)            |
| Lyme arthritis (29)                       | 17 (59)                                          | 4 (14)                                                    | 28 (97)           |
| Other diseases (144)                      |                                                  |                                                           |                   |
| Fibromyalgia (31)                         | 2 (6)                                            | 0 (0)                                                     | 0 (0)             |
| Severe periodontitis (20)                 | 1 (5)                                            | 0 (0)                                                     | 0 (0)             |
| Rheumatoid arthritis (21)                 | 2 (10)                                           | 0 (0)                                                     | 0 (0)             |
| Syphilis (20)                             | 0 (0)                                            | 0 (0)                                                     | 0 (0)             |
| Multiple sclerosis (22)                   | 2 (9)                                            | 0 (0)                                                     | 0 (0)             |
| Infectious mononucleosis (30)             | 10 (33)                                          | 10 (33)                                                   | 1 (3)             |
| Healthy Controls (203)                    |                                                  |                                                           |                   |
| Endemic (101)                             | 11 (11)                                          | NA <sup>a</sup>                                           | 3 (3)             |
| Non-endemic (102)                         | 1 (1)                                            | NA                                                        | 0 (0)             |

<sup>a</sup> IgM criteria were applied only when the duration of illness  $\leq 30$  days. Duration of illness was only considered for other diseases as it does not apply to healthy controls.

<sup>b</sup> NA, not applicable.
